# Supplementary material for: Superoleophobic surfaces with short fluorinated chains?
Source: Royal Society of Chemistry journal article supplement (doi:10.1039/c3sm50643f), 2013-01-01
Supplement: c3sm50643f.pdf [file c3sm50643f.pdf]

## Supporting Information

### **Superoleophobic Surfaces with Short Fluorinated Chains?**

**Thierry Darmanin,<sup>a</sup> and Frederic Guittard<sup>\*a</sup>**

*<sup>a</sup> Université de Nice - Sophia Antipolis & CNRS, Laboratoire de Physique de la Matière Condensée, Groupe Surfaces & Interfaces, Parc Valrose, 06108 Nice Cedex 2, France  
Fax: (+33)4-92-07-61-56; Tel: (+33)4-92-07-61-59;  
E-mail: Frederic.GUITTARD@unice.fr*

### Monomer synthesis

#### ***Synthesis of (2,3-dihydrothieno[3,4-*b*][1,4]dioxin-2-yl)methanamine (EDOT-NH<sub>2</sub>)***

2-(chloromethyl)-2,3-dihydrothieno[3,4-*b*][1,4]dioxine (0.3 g, 1.6 mmol) and potassium phthalimide (0.4 g, 2.2 mmol) were added to 5 mL of DMF. The mixture was heated at 100°C for 24 hrs. Then, the solution was poured in 100 mL of water and the product was extracted with chloroform. The organic layer was washed with cold 0.1 N sodium hydroxide and water and dried over Na<sub>2</sub>SO<sub>4</sub>. Then, the obtained product and hydrazine hydrate (0.16 g, 3.2 mmol) were added to 10 mL of methanol and the mixture heated at 50°C for 1 hr. 25 mL of water were added and the methanol was extracted under vacuum. 2 mL of concentrated HCl were slowly added and the solution was heated at 60°C for 1 hr. After filtration, the filtrate was neutralized with 2 N sodium hydroxide. After solvent evaporation, the product was purified by column chromatography (silica gel; eluent: methanol/ dichloromethane 1:4).

Yield 33 %; Slightly yellow liquid;  $\delta_{\text{H}}$ (200 MHz, CD<sub>3</sub>OD): 6.40 (1 H, d, *J* 3.6), 6.36 (1 H, d, *J* 3.6), 4.23 (1 H, dd, *J* 11.3, *J* 2.0), 4.11 (1 H, m), 3.92 (1 H, dd, *J* 11.3, *J* 7.4), 2.88 (2 H, d, *J* 5.9);  $\delta_{\text{C}}$ (50 MHz, CD<sub>3</sub>OD): 143.07, 142.96, 100.54, 100.36, 76.03, 67.66, 42.58; FTIR (KBr):  $\nu_{\text{max}}/\text{cm}^{-1}$  3371, 2951, 2924, 2870, 1662, 1578, 1486, 1187, 1057, 1022  $\text{cm}^{-1}$ ; MS (70 eV): *m/z* 171 (M<sup>+</sup>, 30), 154 (C<sub>7</sub>H<sub>6</sub>O<sub>2</sub>S<sup>+</sup>, 100), 142 (C<sub>6</sub>H<sub>5</sub>O<sub>2</sub>S<sup>+</sup>, 47).

#### ***Synthesis of EDOT-NH-OF<sub>n</sub>***

Finally, the fluorinated monomers were synthesized by amidification reaction in presence of semi-fluorinated acid, EDC and DMAP. The corresponding semifluorinated acid (1.5 mmol), EDC (0.3 g, 1.5 mmol) and DMAP (40 mg) were added to 20 mL of dichloromethane. After stirring during 30 mn at room temperature, (2,3-dihydrothieno[3,4-*b*][1,4]dioxin-2-yl)methanamine (0.2 g, 1.3 mmol) was added. After stirring for a day at 50°C, the solvent was removed and the crude was purified by column chromatography (silica gel; eluent: ethyl acetate/cyclohexane 50:50) to yield the products.

***N*-((2,3-dihydrothieno[3,4-*b*][1,4]dioxin-2-yl)methyl)-  
4,4,5,5,6,6,7,7,8,8,9,9,10,10,11,11,11-heptafluoroundecanamide (EDOT-NH-F<sub>8</sub>).**

Yield 52 %; m.p. 72.4 °C;  $\delta_{\text{H}}$ (200 MHz,  $\text{CDCl}_3$ ): 6.35 (1 H, d,  $J$  3.8), 6.34 (1 H, d,  $J$  3.8), 5.99 (1 H, m), 4.27 (1 H, m), 4.20 (1 H, dd,  $J$  11.7,  $J$  2.2), 3.92 (1 H, dd,  $J$  11.7,  $J$  = 7.5), 3.72 (1 H, ddd,  $J$  14.4,  $J$  6.5,  $J$  3.8), 3.47 (1 H, ddd,  $J$  14.4,  $J$  6.8,  $J$  5.6), 2.52 (4 H, m);  $\delta_{\text{C}}$ (50 MHz,  $\text{CDCl}_3$ ): 170.19, 141.16, 140.94, 100.10, 99.92, 72.44, 66.11, 39.72, 26.99 (t,  $J$  4.6), 26.65 (t,  $J$  21.0);  $\delta_{\text{F}}$ ( $\text{CDCl}_3$ ): -80.77, -114.65, -121.94, -122.75, -123.51, -126.16; FTIR (KBr):  $\nu_{\text{max}}/\text{cm}^{-1}$  3355, 2955, 2928, 2850, 1653, 1542, 1490, 1260, 1237, 1195, 1146, 1097, 1026  $\text{cm}^{-1}$ ; MS (70 eV):  $m/z$  645 ( $\text{M}^+$ , 25), 530 ( $\text{C}_{10}\text{H}_9\text{F}_9\text{NO}^{+\bullet}$ , 85), 154 ( $\text{C}_7\text{H}_6\text{O}_2\text{S}^+$ , 100).

***N*-((2,3-dihydrothieno[3,4-*b*][1,4]dioxin-2-yl)methyl)-4,4,5,5,6,6,7,7,8,8,9,9,9-tridecafluorononanamide (EDOT-NH-F<sub>6</sub>).**

Yield 58 %; m.p. 58.7 °C; r.t. 17.6 mn;  $\delta_{\text{H}}$ (200 MHz,  $\text{CDCl}_3$ ): 6.35 (1 H, d,  $J$  3.8), 6.34 (1 H, d,  $J$  3.8), 5.98 (1 H, m), 4.27 (1 H, m), 4.20 (1 H, dd,  $J$  11.7,  $J$  2.2), 3.92 (1 H, dd,  $J$  11.7,  $J$  7.5), 3.72 (1 H, ddd,  $J$  14.4,  $J$  6.5,  $J$  3.8), 3.47 (1 H, ddd,  $J$  14.4,  $J$  6.8,  $J$  5.6), 2.52 (4 H, m);  $\delta_{\text{C}}$ (50 MHz,  $\text{CDCl}_3$ ): 170.17, 141.16, 140.93, 100.10, 99.92, 72.44, 66.10, 39.72, 26.94 (t,  $J$  4.3), 26.65 (t,  $J$  21.9);  $\delta_{\text{F}}$ ( $\text{CDCl}_3$ ): -80.80, -114.66, -121.94, -122.91, -123.50, -126.20; FTIR (KBr):  $\nu_{\text{max}}/\text{cm}^{-1}$  3351, 2955, 2924, 2854, 1653, 1544, 1490, 1261, 1226, 1201, 1148, 1072, 1026  $\text{cm}^{-1}$ ; MS (70 eV):  $m/z$  545 ( $\text{M}^+$ , 24), 430 ( $\text{C}_{10}\text{H}_9\text{F}_9\text{NO}^{+\bullet}$ , 95), 154 ( $\text{C}_7\text{H}_6\text{O}_2\text{S}^+$ , 100).

***N*-((2,3-dihydrothieno[3,4-*b*][1,4]dioxin-2-yl)methyl)-4,4,5,5,6,6,7,7,7-nonafluoroheptanamide (EDOT-NH-F<sub>4</sub>).**

Yield 67 %; m.p. 42.5 °C; r.t. 16.3 mn;  $\delta_{\text{H}}$ (200 MHz,  $\text{CDCl}_3$ ): 6.35 (1 H, d,  $J$  3.7), 6.34 (1 H, d,  $J$  3.7), 5.99 (1 H, m), 4.27 (1 H, m), 4.20 (1 H, dd,  $J$  11.7,  $J$  2.2), 3.92 (1 H, dd,  $J$  11.7,  $J$  7.5), 3.72 (1 H, ddd,  $J$  14.4,  $J$  6.5,  $J$  3.8), 3.47 (1 H, ddd,  $J$  14.4,  $J$  6.8,  $J$  5.6), 2.52 (4 H, m);  $\delta_{\text{C}}$ (50 MHz,  $\text{CDCl}_3$ ): 170.17, 141.16, 140.93, 100.10, 99.92, 72.43, 66.10, 39.72, 26.95 (t,  $J$  4.0), 26.55 (t,  $J$  21.7);  $\delta_{\text{F}}$ ( $\text{CDCl}_3$ ): -81.04, -114.91, -124.50, -126.07; FTIR (KBr):  $\nu_{\text{max}}/\text{cm}^{-1}$  3335, 2959, 2924, 2854, 1658, 1555, 1487, 1260, 1229, 1201, 1134, 1097, 1020  $\text{cm}^{-1}$ ; MS (70 eV):  $m/z$  445 ( $\text{M}^+$ , 33), 330 ( $\text{C}_{10}\text{H}_9\text{F}_9\text{NO}^{+\bullet}$ , 100), 154 ( $\text{C}_7\text{H}_6\text{O}_2\text{S}^+$ , 53).
